# Supplementary material for: Exploring disease-related and treatment-related issues and concerns experienced by adults with spondyloarthritis, inflammatory bowel disease and psoriasis to identify unmet needs: a qualitative clinical concept mapping study
Source: HighWire-hosted journal article supplement (doi:10.1136/bmjopen-2023-071586), 2023-12-01
Supplement: bmjopen-2023-071586supp001_data_supplement.pdf [file bmjopen-2023-071586supp001_data_supplement.pdf]

## All statements divided in concepts from the AXIAL SPONDYLOARTHRITIS workshops

| Statements                                                                                                                                      | Frequency of rating* |   |   |   |   | Statement |        | Concept    |          |
|-------------------------------------------------------------------------------------------------------------------------------------------------|----------------------|---|---|---|---|-----------|--------|------------|----------|
|                                                                                                                                                 | 1                    | 2 | 3 | 4 | 5 | Mean      | Median | Mean       | Median   |
| <b>Consequences/Limitations in work-life</b>                                                                                                    |                      |   |   |   |   |           |        |            |          |
| I use my energy wrong. I use it all on work.                                                                                                    |                      | 1 |   |   | 2 | 4,0       | 5      | <b>3.7</b> | <b>4</b> |
| I have felt compelled to tell colleagues that I have some limitations due to Bechterew's disease                                                |                      | 1 | 1 | 1 |   | 3,0       | 3      |            |          |
| I had to tell and be very open about my disease at work                                                                                         |                      |   | 3 |   |   | 3,0       | 3      |            |          |
| Openness at work has been necessary to be understood                                                                                            |                      |   | 3 | 1 |   | 3,3       | 3      |            |          |
| I have to decline jobs because of my disease                                                                                                    |                      | 1 | 1 | 1 |   | 3,0       | 3      |            |          |
| It limits me with regard to new work                                                                                                            |                      | 1 |   | 1 | 1 | 3,7       | 4      |            |          |
| Is there anyone who wants to hire me, if they know about my disease?                                                                            |                      |   | 2 |   | 1 | 3,7       | 3      |            |          |
| I never told I had Bechterew's disease at work. I want to be judged for my work and not my disease                                              |                      |   | 3 |   |   | 3,0       | 3      |            |          |
| I will always tell my employer about my disease                                                                                                 |                      | 1 | 2 |   |   | 2,7       | 3      |            |          |
| I arrange my work-life so that I can keep up with it and recharge                                                                               |                      |   | 1 | 2 |   | 3,7       | 4      |            |          |
| I have worked part-time to prioritize my disease and family life in order to have enough energy                                                 |                      | 1 |   |   | 2 | 4,0       | 5      |            |          |
| I have reduced my work hours and thus my salary, so it costs money to be ill                                                                    |                      | 1 | 1 | 1 |   | 3,0       | 3      |            |          |
| The options for pension and flexjob are very limited in relation to knowledge about disease in the public sector                                |                      |   |   | 2 | 1 | 4,3       | 4      |            |          |
| I have gone from 110 per cent to 90 per cent because of my disease                                                                              |                      |   | 1 | 1 | 1 | 4,0       | 4      |            |          |
| All treatment and physiotherapy take place during the day, which then affects my workday                                                        |                      |   | 1 | 1 | 1 | 4,0       | 4      |            |          |
| I have made a conscious career change from "fast pace" in the private sector to a position in the public sector to take my disease into account |                      | 1 |   |   | 2 | 4,0       | 5      |            |          |
| Home working days due to covid have given increased flexibility in everyday life                                                                |                      |   |   | 2 | 1 | 4,3       | 4      |            |          |
| Can I work and be active in the future or will I have to live differently?                                                                      |                      |   |   | 1 | 2 | 4,7       | 5      |            |          |
| I had to arrange my work-life so that I could rest                                                                                              |                      | 1 |   |   | 1 | 3,5       | 4      |            |          |
| Due to my disease, I retired earlier than expected                                                                                              |                      | 1 |   |   | 1 | 3,5       | 4      |            |          |
| The first three months of my early retirement were the longest of my life                                                                       |                      |   |   | 1 | 1 | 4,5       | 5      |            |          |
| My work-life stopped very abruptly                                                                                                              |                      |   |   | 1 | 1 | 4,5       | 5      |            |          |
| <b>Worries now and in the future</b>                                                                                                            |                      |   |   |   |   |           |        |            |          |
| Worry about whether I can keep up with my work-life                                                                                             |                      |   | 1 |   | 2 | 4,3       | 5      | <b>3.6</b> | <b>4</b> |
| Uncertainty about the future                                                                                                                    |                      |   | 3 |   |   | 3,0       | 3      |            |          |
| Will I be able to start a family?                                                                                                               |                      |   | 1 | 1 | 1 | 4,0       | 4      |            |          |
| Uncertainty with the new unpredictability in my life                                                                                            |                      | 1 |   | 2 |   | 3,3       | 4      |            |          |
| I am worried about passing it on to my children                                                                                                 |                      | 1 | 1 |   | 1 | 3,3       | 3      |            |          |
| I am worried about getting diseases related to Bechterew's disease                                                                              |                      |   | 2 | 1 |   | 3,3       | 3      |            |          |
| What does the medicine do to my body in the long run?                                                                                           |                      |   | 1 | 1 | 1 | 4,0       | 4      |            |          |
| It is unpredictable who will have effect of the medicine and how long it works                                                                  |                      |   | 3 |   |   | 3,0       | 3      |            |          |
| Worried that my back is growing together                                                                                                        |                      |   | 2 |   | 1 | 3,7       | 3      |            |          |
| Concerned about the development of the disease over time                                                                                        |                      |   |   | 2 | 1 | 4,3       | 4      |            |          |
| Does fatigue increase over time?                                                                                                                |                      |   |   | 2 | 1 | 4,3       | 4      |            |          |
| Do back and joint stiffness increase?                                                                                                           |                      |   |   | 2 | 1 | 4,3       | 4      |            |          |
| I am worried whether I can continue my sport if the disease develops                                                                            |                      |   | 2 |   | 1 | 3,7       | 3      |            |          |
| I am worried whether my daughter will inherit the disease                                                                                       | 1                    |   |   | 1 | 1 | 3,3       | 4      |            |          |
| I am worried that my stiff neck will result in me losing my driver's licens                                                                     | 1                    |   |   | 1 | 1 | 3,3       | 4      |            |          |
| I am worried about the biological medicine stop working and I have a relapse                                                                    |                      | 1 |   |   | 2 | 4,0       | 5      |            |          |
| Those who are close to me do not need to worry. I leave that to the healthcare professionals                                                    | 2                    |   |   |   | 1 | 2,3       | 1      |            |          |
| <b>Take responsibility for your own situation</b>                                                                                               |                      |   |   |   |   |           |        |            |          |

|                                                                                                                             |   |   |   |   |   |     |   |     |   |
|-----------------------------------------------------------------------------------------------------------------------------|---|---|---|---|---|-----|---|-----|---|
| Openness to family and friends about the disease                                                                            |   |   | 1 |   | 2 | 4,3 | 5 | 3.8 | 4 |
| You must take responsibility for your own situation and not sit back                                                        |   |   | 1 | 2 |   | 3,7 | 4 |     |   |
| You can do something yourself                                                                                               |   |   |   | 3 |   | 4,0 | 4 |     |   |
| Recreation and interests are very important so that the disease does not take up so much                                    |   |   |   | 2 | 1 | 4,3 | 4 |     |   |
| You have to get input, e.g., socially and culturally, so that the disease gets less space                                   |   |   |   | 1 | 2 | 4,7 | 5 |     |   |
| Mental health becomes charged with positive things                                                                          |   |   |   | 1 | 2 | 4,7 | 5 |     |   |
| Now that there is limited medical treatment available, positive distractions are even more important                        |   | 1 |   | 1 | 1 | 3,7 | 4 |     |   |
| It is important to set goals including sub-goals                                                                            |   | 1 |   | 1 | 1 | 3,7 | 4 |     |   |
| I ride my bike a lot and I am really happy about that. I would be sad if I could not do that                                |   |   | 1 | 1 | 1 | 4,0 | 4 |     |   |
| Being able to run every day makes me really happy. It gives me a boost in everyday life                                     |   |   | 1 | 1 | 1 | 4,0 | 4 |     |   |
| It is good to have a routine so that I get up and go out every morning                                                      | 1 |   |   | 2 |   | 3,0 | 4 |     |   |
| It is important to be open to yourself, also in relation to alternative treatment                                           |   |   | 1 | 2 |   | 3,7 | 4 |     |   |
| Am I doing enough myself to manage my disease?                                                                              |   |   | 1 | 2 |   | 3,7 | 4 |     |   |
| Can I counteract the development of my disease myself?                                                                      |   |   | 1 | 2 |   | 3,7 | 4 |     |   |
| Quality of life and content are very important                                                                              |   |   |   | 1 | 2 | 4,7 | 5 |     |   |
| Should I be patient-ignorant or take responsibility and thus be an expert?                                                  | 1 |   | 2 |   |   | 2,3 | 3 |     |   |
| It is an advantage to be prepared before the appointment at the hospital                                                    |   |   |   | 2 | 1 | 4,3 | 4 |     |   |
| I solve the challenges I face with my disease                                                                               |   | 1 | 1 |   |   | 2,5 | 3 |     |   |
| <b>Identity/recognition/accept</b>                                                                                          |   |   |   |   |   |     |   |     |   |
| I cannot do everything I would like to and have a hard time accepting that                                                  |   |   |   | 1 | 2 | 4,7 | 5 | 3.2 | 3 |
| My disease does not matter much. Has become a part of my life                                                               |   |   |   | 2 | 1 | 3,3 | 3 |     |   |
| The disease affects social life. Makes it awkward                                                                           |   | 1 | 1 | 1 |   | 3,0 | 3 |     |   |
| It has been a process to tell others I don't know, that I have a disease                                                    |   |   | 1 | 2 |   | 3,7 | 4 |     |   |
| When you are not ill, you have the privilege of being normal                                                                |   | 1 | 1 |   | 1 | 3,3 | 3 |     |   |
| When you are ill, you are both ill and have to put yourself in a vulnerable situation of having to tell colleagues about it |   |   |   | 3 |   | 3,0 | 3 |     |   |
| I work full time so no one will say I am sick                                                                               |   |   | 1 | 2 |   | 3,7 | 4 |     |   |
| At times you can feel a little self-pity                                                                                    |   |   | 1 | 1 | 1 | 4,0 | 4 |     |   |
| Why me?                                                                                                                     |   |   | 1 | 2 |   | 3,7 | 4 |     |   |
| I have opted out of being part of patient associations in order not to be a patient                                         | 2 |   | 1 |   |   | 1,7 | 1 |     |   |
| My identity is not to be a patient, on the other hand, I am 100 per cent something else                                     | 1 |   | 1 |   | 1 | 3,0 | 3 |     |   |
| It has always been my trademark to be physically strong and the disease will not change that                                |   | 1 |   | 1 | 1 | 3,7 | 4 |     |   |
| I have said no to paid physiotherapy because then I am not a patient and have chosen private physiotherapy instead          | 2 |   | 1 |   |   | 1,7 | 1 |     |   |
| I have learned more about myself - for better or for worse                                                                  |   |   | 2 |   | 1 | 3,7 | 3 |     |   |
| I have gained insight into what is important for me to be able to do and what matters                                       |   |   |   | 3 |   | 4,0 | 4 |     |   |
| My sister didn't want to take medicine because she then felt ill                                                            | 2 | 1 |   |   |   | 1,3 | 1 |     |   |
| I have not felt a deprivation due to my disease because I do not know what I have missed out on                             |   | 1 | 2 |   |   | 2,7 | 3 |     |   |
| My boyfriend got another package                                                                                            | 1 |   | 1 |   | 1 | 3,0 | 3 |     |   |
| My boyfriend gets involved in the treatment by, for example, having to tape a shoulder and he should not have to            | 2 |   |   |   | 1 | 2,3 | 1 |     |   |
| I see my wife's concern as support more than a worry                                                                        |   |   | 1 | 1 | 1 | 4,0 | 4 |     |   |
| The heredity of the disease has played a role in having children, but not decisively                                        | 1 |   |   | 1 | 1 | 3,3 | 4 |     |   |
| <b>Surrounding's/relatives understanding and "good" advice</b>                                                              |   |   |   |   |   |     |   |     |   |
| People find it difficult to accept my situation and its limitations                                                         |   | 1 | 1 |   | 1 | 3,3 | 3 | 3.2 | 3 |
| People have considered me to be a hypochondriac                                                                             |   |   | 1 | 2 |   | 3,7 | 4 |     |   |

|                                                                                                                  |   |   |   |   |   |     |   |     |   |
|------------------------------------------------------------------------------------------------------------------|---|---|---|---|---|-----|---|-----|---|
| I cannot stand other people's worries                                                                            |   |   | 2 |   | 1 | 3,7 | 3 |     |   |
| My wife does not worry, on the contrary, she paces me a little                                                   | 2 |   |   |   | 1 | 2,3 | 1 |     |   |
| I experience understanding for my disease when I talk about it                                                   |   |   | 2 |   | 1 | 3,7 | 3 |     |   |
| People find it difficult to accept my situation and its limitations                                              |   |   | 1 | 1 | 1 | 4,0 | 4 |     |   |
| People are not aware of and do not understand that I need, for example, to rest in the afternoon                 | 1 |   |   | 1 | 1 | 3,3 | 4 |     |   |
| I experience a discrepancy between the understanding of pain versus fatigue                                      |   |   | 1 | 1 | 1 | 4,0 | 4 |     |   |
| Now stop that nonsense                                                                                           |   |   | 1 | 1 |   | 3,5 | 4 |     |   |
| You just have to...                                                                                              |   |   | 1 | 1 |   | 3,5 | 4 |     |   |
| There is an incredible amount of good advice                                                                     |   | 1 |   | 1 |   | 3,0 | 3 |     |   |
| The good advice is probably well-intentioned                                                                     | 1 |   | 1 |   |   | 2,0 | 2 |     |   |
| I think my boyfriend is overprotective of me                                                                     |   | 1 | 1 |   |   | 2,5 | 3 |     |   |
| I am made more vulnerable than I am                                                                              |   | 1 | 1 |   |   | 2,5 | 3 |     |   |
| My wife worries about me more than I do                                                                          |   | 1 | 1 |   |   | 2,5 | 3 |     |   |
| <b>Diagnosis/medicine/treatment</b>                                                                              |   |   |   |   |   |     |   |     |   |
| I am glad that I can tolerate my medicine                                                                        |   |   |   | 1 | 2 | 4,7 | 5 | 3.4 | 4 |
| When I can no longer take NSAIDs, I will have to take Codipar, which is perhaps not appropriate for driving      | 2 |   |   |   | 1 | 2,3 | 1 |     |   |
| I wish there was a better alternative to painkillers that do not affect my driving                               | 2 |   |   |   | 1 | 2,3 | 1 |     |   |
| When I experienced treatment failure, I learned why I take the medicine                                          |   | 1 |   |   | 2 | 4,0 | 5 |     |   |
| I stopped feeling ill after I stopped taking the medicine                                                        |   | 1 |   | 1 | 1 | 3,7 | 4 |     |   |
| The disease is so significant if I do not get medicine so there is no alternative                                |   | 1 |   |   | 2 | 4,0 | 5 |     |   |
| I do not worry about side effects to the medicine as the effect far exceeds the side effects                     |   | 1 |   |   | 2 | 4,0 | 5 |     |   |
| I never felt like I needed medicine other than a little painkiller                                               | 1 | 1 |   |   | 1 | 2,7 | 2 |     |   |
| I think about whether the progression of my disease would have been different if I had received medicine earlier | 1 | 1 | 1 |   |   | 2,0 | 2 |     |   |
| Many people experience a long process before they get their diagnosis                                            | 1 |   | 1 |   | 1 | 3,0 | 3 |     |   |
| The experience until you get the diagnosis is a bit random compared to whom you meet on your way                 |   | 1 | 1 |   | 1 | 3,3 | 3 |     |   |
| I don't know if I could have benefited from medication via the hospital                                          | 1 | 1 |   |   | 1 | 2,7 | 2 |     |   |
| Before my diagnosis, the pain was the focus of my everyday life                                                  |   |   |   |   | 2 | 5,0 | 5 |     |   |
| It was a relief to get the diagnosis                                                                             |   |   |   | 1 | 1 | 4,5 | 5 |     |   |
| I thought I was crazy before I got the diagnosis                                                                 |   |   | 1 | 1 |   | 3,5 | 4 |     |   |
| I was given hope that my pain would go away when I was diagnosed                                                 |   |   |   | 1 | 1 | 4,5 | 5 |     |   |
| I had an expectation that something could be done when I received my diagnosis                                   |   |   |   | 1 | 1 | 4,5 | 5 |     |   |
| I am thinking about how long my body can take this medicine                                                      |   | 1 |   | 1 |   | 3,0 | 3 |     |   |
| It is probably not completely harmless to take medicine for a long time                                          |   | 1 |   | 1 |   | 3,0 | 3 |     |   |
| Medicine is good for something and maybe not good for something else                                             |   | 1 |   | 1 |   | 3,0 | 3 |     |   |
| I go less to the hospital after I have switched to medication, I can take at home                                |   |   | 1 | 1 |   | 3,5 | 4 |     |   |
| I am incredibly happy to go to the hospital to receive my medicine                                               | 1 |   | 1 |   |   | 2,0 | 2 |     |   |
| I find it scary how dependent I am on that medicine                                                              |   |   | 1 |   | 1 | 4,0 | 4 |     |   |
| Five days before I have to get my medicine, I can feel my disease                                                |   |   | 1 | 1 |   | 3,5 | 4 |     |   |
| I have experienced worse treatment in outer Denmark                                                              |   | 1 |   | 1 |   | 3,0 | 3 |     |   |
| <b>Lack of understanding/to be heard and seen by healthcare professionals</b>                                    |   |   |   |   |   |     |   |     |   |
| No one listened to me when my symptoms started                                                                   |   |   | 1 | 1 | 1 | 4,0 | 4 | 4.0 | 4 |
| There is a lack of openness and recognition regarding alternative treatment options in the healthcare system     |   | 1 | 1 | 1 |   | 3,0 | 3 |     |   |
| In the time before my diagnosis, I have lost trust in the health care professionals                              |   |   |   | 1 | 1 | 4,5 | 5 |     |   |
| I did not feel heard or seen until I was diagnosed                                                               |   |   |   | 1 | 1 | 4,5 | 5 |     |   |
| I was asked to exercise more even though I was already exercising                                                |   |   | 1 |   | 1 | 4,0 | 4 |     |   |

|                                                                                                                     |   |   |   |   |   |     |     |   |     |
|---------------------------------------------------------------------------------------------------------------------|---|---|---|---|---|-----|-----|---|-----|
| I did not feel I got help to solve my challenges                                                                    |   |   | 1 |   | 1 | 4,0 | 4   |   |     |
| You just need to take some painkillers (symptom treatment)                                                          |   |   | 1 |   | 1 | 4,0 | 4   |   |     |
| I was not examined when I came with my pain                                                                         |   |   |   | 1 | 1 | 4,5 | 5   |   |     |
| I had the feeling that others thought it was something I was imagining                                              |   | 1 |   |   | 1 | 3,5 | 4   |   |     |
| <b>Everyday life with Bechterew's disease</b>                                                                       |   |   |   |   |   |     |     |   |     |
| There are many things I would like to do. And sometimes I push myself too much                                      |   |   |   |   | 3 |     | 4,0 | 4 |     |
| Wish I had more energy in my spare time                                                                             |   |   |   |   | 2 | 1   | 4,3 | 4 |     |
| Fatigue is paramount for me                                                                                         |   |   | 1 |   | 2 |     | 3,7 | 4 |     |
| Træthed har været årsag til at jeg har skiftet job                                                                  | 1 |   |   | 1 | 1 |     | 3,3 | 4 |     |
| I have had to put myself aside                                                                                      |   | 1 | 1 | 1 |   |     | 3,0 | 3 |     |
| I have to spend a lot of time on mobility exercises and physiotherapy that others don't have to                     |   | 1 | 2 |   |   |     | 2,7 | 3 |     |
| I have to opt out because my disease takes time                                                                     |   | 1 | 1 |   | 1 |     | 3,3 | 3 |     |
| It is not fair that I have to spend time on e.g. exercises when others don't have to                                |   | 1 |   |   | 2 |     | 3,3 | 4 |     |
| My spare time is filled with disease obligations instead of what I want to do                                       |   | 1 |   | 1 | 1 |     | 3,7 | 4 |     |
| If I don't exercise, I don't have the energy to do what I have to do. It is unfair                                  |   | 1 | 1 | 1 |   |     | 3,0 | 3 |     |
| I limit myself in terms of hard physical work in everyday life due to the disease                                   |   | 1 | 2 |   |   |     | 2,7 | 3 | 3.5 |
| For me, cold means inactivity due to joint pain                                                                     | 1 | 1 |   | 1 |   |     | 2,3 | 2 | 4   |
| If I am too active, it costs me energy the next day                                                                 |   | 1 | 1 | 1 |   |     | 3,0 | 3 |     |
| Definitely, a need to rest in the afternoon to function well                                                        |   |   |   |   | 3 |     | 5,0 | 5 |     |
| I had to constantly balance the things I wanted to do with my pain                                                  |   | 1 |   |   | 1 |     | 3,5 | 4 |     |
| What does it cost in terms of pain to do what I want to do?                                                         |   | 1 |   | 1 |   |     | 3,0 | 3 |     |
| You only have a certain amount of energy to spend each day                                                          |   |   |   | 1 | 1 |     | 4,5 | 5 |     |
| I cannot do housework                                                                                               |   |   |   | 1 | 1 |     | 4,5 | 5 |     |
| It annoys me endlessly that I cannot do work at home                                                                |   |   |   | 1 | 1 |     | 4,5 | 5 |     |
| Things in everyday life are challenging for me due to Bechterew's disease                                           |   |   | 1 |   | 1 |     | 4,0 | 4 |     |
| It annoys me that I am not so flexible in my body                                                                   |   |   |   | 1 | 1 |     | 4,5 | 5 |     |
| I am stiff in the body and that limits me in terms of swimming                                                      |   |   | 1 |   | 1 |     | 4,0 | 4 |     |
| I do not worry about my disease                                                                                     |   | 2 |   |   |   |     | 2,0 | 2 |     |
| Sometimes there is too much focus on my situation/Bechterew's disease                                               |   | 1 | 1 |   |   |     | 2,5 | 3 |     |
| I can no longer tolerate alcohol as a result of my disease                                                          |   | 1 |   | 1 |   |     | 3,0 | 3 |     |
| <b>Meeting the hospital/healthcare system</b>                                                                       |   |   |   |   |   |     |     |   |     |
| You must not let yourself be taken over by the system                                                               |   |   | 2 | 1 |   |     | 3,3 | 3 |     |
| Rheumatologists also considered me to be a hypochondriac                                                            |   |   | 2 |   | 1 |     | 3,7 | 3 |     |
| There are unrealistic expectations of what the doctor thinks I can achieve in my everyday life in terms of exercise |   | 1 | 2 |   |   |     | 2,7 | 3 |     |
| If you have Bechterew's disease, it is almost a guarantee that you will not get Crohn's disease                     | 1 |   | 1 | 1 |   |     | 2,7 | 3 |     |
| Much focus is placed on pain in relation to the disease                                                             |   |   | 3 |   |   |     | 3,0 | 3 |     |
| Lack of information about what the consequence of the medicine is                                                   |   |   | 1 | 2 |   |     | 3,7 | 4 |     |
| I feel seen and heard by my doctor                                                                                  |   |   |   | 2 | 1 |     | 4,3 | 4 |     |
| At the doctor's, it is a lot about medicine                                                                         |   |   | 1 | 2 |   |     | 3,7 | 4 |     |
| Danbio is a good tool in the meeting with the doctor                                                                |   |   |   | 2 | 1 |     | 4,3 | 4 |     |
| Especially the nurses see and hear me                                                                               |   |   | 1 | 1 | 1 |     | 4,0 | 4 |     |
| Exchange of your regular doctor can be a challenge                                                                  |   |   | 1 | 2 |   |     | 3,7 | 4 |     |
| It is a good thing to be able to write directly to the doctor if in doubt                                           |   |   |   | 1 | 2 |     | 4,7 | 5 |     |
| I have generally felt really well taken care of and met by competent healthcare professionals                       |   |   | 2 |   | 1 |     | 3,7 | 3 |     |
| My strategy is to let the doctor worry about the disease and not me                                                 |   | 1 | 1 |   | 1 |     | 3,3 | 3 | 3.3 |
| I have confidence in healthcare professionals in general regarding my disease                                       |   |   | 1 | 2 |   |     | 3,7 | 4 | 3   |
| I have experienced a shift in confidence - felt alone with the disease                                              | 1 | 1 |   |   | 1 |     | 2,7 | 2 |     |
| I stopped at the physiotherapist as I did not feel he could do anything for me that I could not do myself           | 2 |   | 1 |   |   |     | 1,7 | 1 |     |

|                                                                                                                                          |   |   |   |   |   |     |   |            |          |
|------------------------------------------------------------------------------------------------------------------------------------------|---|---|---|---|---|-----|---|------------|----------|
| I think it is reasonable after paying taxes for forty years, that I use the healthcare system                                            | 1 |   | 1 |   | 1 | 3,0 | 3 |            |          |
| I feel I am burdening the public sector because of a banality                                                                            | 2 |   | 1 |   |   | 1,7 | 1 |            |          |
| I cost the public sector a lot of money                                                                                                  | 1 | 1 | 1 |   |   | 2,0 | 2 |            |          |
| I feel that I inconvenience the public system unnecessarily                                                                              | 2 |   | 1 |   |   | 1,7 | 1 |            |          |
| I have great chemistry with my doctor and that makes me feel safe                                                                        |   |   | 1 |   | 1 | 4,0 | 4 |            |          |
| I feel my doctor sincerely listens and hears what I say                                                                                  |   |   |   | 1 | 1 | 4,5 | 5 |            |          |
| It is important that my doctor continues                                                                                                 |   | 1 |   |   | 1 | 3,5 | 4 |            |          |
| My doctor made me aware of my rights                                                                                                     |   |   | 1 |   | 1 | 4,0 | 4 |            |          |
| It is important that you, as a patient, feel free to speak up against the system you have become a part of                               |   |   | 1 | 1 |   | 3,5 | 4 |            |          |
| <b>Life with Bechterew's disease</b>                                                                                                     |   |   |   |   |   |     |   |            |          |
| Difficult to plan your life for the long term                                                                                            |   |   | 3 |   |   | 3,0 | 3 |            |          |
| It gives me less confidence that the disease can suddenly overwhelm me                                                                   |   |   | 2 | 1 |   | 3,3 | 3 |            |          |
| The mind and the physical are connected                                                                                                  |   |   | 1 |   | 2 | 4,3 | 5 |            |          |
| The unpredictability can lead to worries which can lead to a depressive state                                                            |   | 1 |   |   | 2 | 4,0 | 5 | <b>3.6</b> | <b>4</b> |
| Being ill offers the opportunity to seek financial compensation, but it costs energy                                                     |   |   | 2 | 1 |   | 3,3 | 3 |            |          |
| I have joined the patient association to meet others with the disease                                                                    |   | 1 |   | 2 |   | 3,3 | 4 |            |          |
| Stress has a big impact on my disease                                                                                                    |   |   | 1 | 2 |   | 3,7 | 4 |            |          |
| *Rating - 1: 'Not important at all', 2: 'A little important', 3: 'Somewhat important', 4: 'Very important' and 5: 'Of great importance'. |   |   |   |   |   |     |   |            |          |

## All statements divided in concepts from the PSORIATIC ARTHRITIS workshops

| Statements                                                                                                                 | Frequency of rating* |   |   |   |   | Statement |        | Concept |        |
|----------------------------------------------------------------------------------------------------------------------------|----------------------|---|---|---|---|-----------|--------|---------|--------|
|                                                                                                                            | 1                    | 2 | 3 | 4 | 5 | Mean      | Median | Mean    | Median |
| <b>Concerns in relation to my illness/unanswered questions</b>                                                             |                      |   |   |   |   |           |        |         |        |
| What must I do? If I feel pain, must I stop what I'm doing?                                                                |                      |   |   |   | 3 | 3.0       | 3      | 3.7     | 4      |
| What makes my condition worse or better?                                                                                   |                      |   |   | 1 | 2 | 4.7       | 5      |         |        |
| I have many unanswered questions.                                                                                          |                      |   |   | 2 | 1 | 4.3       | 4      |         |        |
| I would like more information as regards what I can do myself                                                              |                      |   | 2 |   | 2 | 4.0       | 4      |         |        |
| Is my illness at a standstill, - should I resign myself to where I am now?                                                 |                      |   | 1 | 3 |   | 3.8       | 4      |         |        |
| It's hard to know whether I should continue when it hurts                                                                  |                      | 2 |   | 2 |   | 3.0       | 3      |         |        |
| Thinking about whether I can stay in my apartment because my knees were so sore                                            |                      |   |   | 1 | 1 | 4.5       | 5      |         |        |
| What are my prospects                                                                                                      |                      |   |   | 2 | 2 | 4.5       | 5      |         |        |
| The pain has not improved after I took my medication (MTX)                                                                 |                      |   |   | 1 | 1 | 4.5       | 5      |         |        |
| Concerned for the future                                                                                                   |                      |   |   | 3 | 1 | 4.3       | 4      |         |        |
| Worried about experiencing more pain                                                                                       |                      |   |   | 3 | 1 | 4.3       | 4      |         |        |
| It worries me that my mobility may be reduced                                                                              |                      |   |   | 3 | 1 | 4.3       | 4      |         |        |
| If it becomes worse - I will feel like I'm in deep trouble                                                                 |                      |   |   | 4 |   | 4.0       | 4      |         |        |
| How bad will it become - will I end up in a wheelchair?                                                                    |                      |   | 1 | 2 | 1 | 4.0       | 4      |         |        |
| Worries about my physical condition in general                                                                             |                      |   | 1 | 2 | 1 | 4.0       | 4      |         |        |
| What can it develop into                                                                                                   | 1                    |   |   | 1 | 2 | 3.8       | 5      |         |        |
| I'm concerned about the limitations the illness forces on my everyday                                                      |                      |   | 2 | 1 | 1 | 3.8       | 4      |         |        |
| When I was diagnosed, I was afraid I would end up in a wheelchair                                                          | 1                    | 1 |   | 1 | 1 | 3.0       | 3      |         |        |
| Could not get a clear overview of the consequences the illness might possibly result in? Lose my apartment, be fired, etc? |                      |   | 1 | 1 | 1 | 3.0       | 4      |         |        |
| Worry about whether I can still be active with my kids, if I feel worse                                                    | 2                    |   |   | 1 | 1 | 2.8       | 3      |         |        |
| What worries me is not being able to interact with my children                                                             | 2                    | 1 |   |   | 1 | 2.3       | 2      |         |        |
| I'm concerned that I might need help getting out of bed for example                                                        | 2                    |   | 1 | 1 |   | 2.3       | 2      |         |        |
| The development of my illness - will it get worse?                                                                         |                      |   |   | 1 | 3 | 4.8       | 5      |         |        |
| I could not return to the job I had before the illness                                                                     |                      |   |   | 1 | 2 | 4.7       | 5      |         |        |
| What job opportunities are there if I do not have a job?                                                                   |                      |   | 1 | 1 | 2 | 4.3       | 5      |         |        |
| Worry about whether my current job is too physically demanding                                                             | 1                    |   |   | 2 |   | 2.3       | 3      |         |        |
| Financial worries                                                                                                          | 1                    |   | 1 | 1 |   | 2.0       | 2      |         |        |
| How long can I continue to work                                                                                            | 1                    |   |   |   | 2 | 2.8       | 3      |         |        |
| <b>Consequences of pain and fatigue, what I will be subjected to, feelings about that</b>                                  |                      |   |   |   |   |           |        |         |        |
| Worsening of pain                                                                                                          |                      |   |   | 1 | 3 | 4.8       | 5      | 3.7     | 4      |
| Before I had biological medication, I could not get up from the floor                                                      |                      |   |   | 1 | 2 | 4.7       | 5      |         |        |
| Difficulty with cutting because of the pain                                                                                |                      |   |   | 1 | 2 | 4.7       | 5      |         |        |
| Had a hard time getting up because of pain in fingers and wrist                                                            |                      |   |   | 2 | 2 | 4.5       | 5      |         |        |
| Wake up with severe pain at night                                                                                          |                      |   |   | 2 | 1 | 4.3       | 4      |         |        |
| Hurts a lot - dietary does not help                                                                                        | 1                    |   | 2 |   | 1 | 3.0       | 3      |         |        |
| My arthritis is very much influenced by the fluctuating Danish weather                                                     | 1                    | 1 | 1 | 1 |   | 2.5       | 3      |         |        |
| It's a vicious cycle I have fallen into                                                                                    |                      |   |   | 1 | 2 | 4.7       | 5      |         |        |
| It is stressful because they (the system) do not do anything to help me                                                    |                      |   |   | 2 | 2 | 4.5       | 5      |         |        |
| My husband is also affected by me receiving chemotherapy (MTX)                                                             |                      |   |   | 2 | 1 | 4.3       | 4      |         |        |
| My husband is anxious on my behalf because I am receiving chemotherapy (MTX)                                               |                      |   |   | 2 | 1 | 4.3       | 4      |         |        |
| I hide my hands                                                                                                            |                      |   |   | 2 | 1 | 4.3       | 4      |         |        |
| When I am in pain, I do not use my body as I would like, - affects me a lot                                                |                      |   |   | 3 | 1 | 4.3       | 4      |         |        |
| I turn the anger inward so as not to upset anybody                                                                         |                      |   | 1 | 2 | 1 | 4.0       | 4      |         |        |
| Mental impact - the illness dampens my mood                                                                                |                      |   | 2 | 1 | 1 | 3.8       | 4      |         |        |
| The pain associated with psoriatic arthritis is great                                                                      |                      |   | 1 | 3 |   | 3.8       | 4      |         |        |
| Feel guilty about not doing what I know I can to feel better                                                               |                      |   | 2 | 1 | 1 | 3.8       | 4      |         |        |
| Suffering from psoriatic arthritis is a full-time job                                                                      |                      | 1 | 1 | 2 |   | 3.3       | 4      |         |        |
| Loss of vigour for periods                                                                                                 | 1                    |   | 1 | 2 |   | 3.0       | 4      |         |        |
| Consequences of not being able to use my body - the basic level is deteriorating more and more                             |                      |   | 1 | 2 | 1 | 4.0       | 4      |         |        |

|                                                                                                      |   |   |   |   |   |     |   |     |   |
|------------------------------------------------------------------------------------------------------|---|---|---|---|---|-----|---|-----|---|
| My body is becoming more and more twisted (due to illness/inactivity)                                | 1 |   |   | 2 | 1 | 3.5 | 4 |     |   |
| I have to sleep for a few hours when I get home from work                                            | 2 | 1 |   |   | 1 | 2.3 | 2 |     |   |
| I am very much affected by fatigue                                                                   |   |   |   | 1 | 2 | 4.7 | 5 |     |   |
| Increased fatigue                                                                                    |   |   |   | 2 | 2 | 4.5 | 5 |     |   |
| I am very tired - use up all my energy at work                                                       | 1 | 1 | 1 |   | 1 | 2.8 | 3 |     |   |
| My pain restricts my participation in Yoga etc. (physical activity)                                  |   |   | 2 | 1 | 1 | 3.8 | 4 |     |   |
| Lose things                                                                                          | 1 |   |   | 2 | 1 | 3.5 | 4 |     |   |
| Constantly losing things, - very frustrating                                                         | 1 |   |   | 2 | 1 | 3.5 | 4 |     |   |
| Difficulty performing work because of arthritis                                                      | 1 |   |   | 1 | 1 | 3.3 | 3 |     |   |
| Many limitations as regards being with my children - need help from others                           | 2 |   | 1 |   | 1 | 2.5 | 2 |     |   |
| Limitations as regards my grandchildren                                                              | 3 |   |   |   |   | 1.0 | 1 |     |   |
| Have difficulty climbing stairs - no strength in my joints (hard)                                    |   |   | 1 | 1 | 1 | 4.0 | 4 |     |   |
| <b>Medication (effects and adverse effects)</b>                                                      |   |   |   |   |   |     |   |     |   |
| Concerns about the medication                                                                        |   |   |   |   | 4 | 5.0 | 5 |     |   |
| Does the medication work?                                                                            |   |   | 1 |   | 3 | 4.5 | 5 |     |   |
| Decreases the effect (of the medication) over time                                                   |   |   |   | 2 | 2 | 4.5 | 5 |     |   |
| What impact does the medication have on me                                                           |   |   |   | 3 | 1 | 4.3 | 4 |     |   |
| There are many adverse effects from all the medications I take because of my illness(es)             |   |   |   | 3 | 1 | 4.3 | 4 |     |   |
| You never hear any good stories about MTX - why should I take it?                                    |   |   | 1 | 1 | 1 | 4.0 | 4 |     |   |
| I worry a lot about whether the biological medication I receive can cause cancer                     |   | 1 |   | 1 | 2 | 4.0 | 5 |     |   |
| If the medication does not work - will I be on a roundabout for the rest of my life                  | 1 |   |   | 2 | 1 | 3.5 | 4 |     |   |
| Concerned about whether I can have children because of the medication                                | 2 |   |   |   | 2 | 3.0 | 3 |     |   |
| The medication causes hair loss (Arava)                                                              |   |   |   | 1 | 2 | 4.7 | 5 |     |   |
| The frequency of the arthritis attacks has increased markedly after I received MTX                   |   |   |   | 1 | 1 | 4.5 | 5 |     |   |
| I am mentally affected by medication                                                                 |   |   |   | 2 | 2 | 4.5 | 5 |     |   |
| Hair loss (adverse effect)                                                                           |   |   |   | 2 | 2 | 4.5 | 5 |     |   |
| It's annoying that I have to howl all the time (adverse effect)                                      |   |   |   | 2 | 1 | 4.3 | 4 |     |   |
| I get angry over nothing - snarling all the time                                                     |   |   |   | 2 | 1 | 4.3 | 4 |     |   |
| I don't want to read the leaflet about the adverse effects, as I'll just feel bad                    |   |   | 1 | 1 | 2 | 4.3 | 5 |     |   |
| Get sore ankles and swollen toes (arthritis) from MTX                                                |   |   | 1 | 1 | 2 | 4.3 | 5 |     |   |
| Become more tired when I take the medication (MTX)                                                   |   |   | 1 | 1 | 1 | 4.0 | 4 | 3.8 | 4 |
| After I started the MTX, I become very sad                                                           |   |   | 1 | 2 | 1 | 4.0 | 4 |     |   |
| I think I get a fever from the MTX (adverse effect) - my bedclothes are dripping wet after I take it |   |   | 1 | 1 | 1 | 4.0 | 4 |     |   |
| After I started taking MTX I feel that I suffer flu-like symptoms                                    |   |   | 1 | 2 | 1 | 4.0 | 4 |     |   |
| Adverse effects from the medication (MTX)                                                            |   |   | 1 | 1 | 2 | 4.3 | 5 |     |   |
| I become aggressive for the first few days I take MTX (adverse effect)                               |   | 1 |   | 2 | 1 | 3.8 | 4 |     |   |
| Adverse effects from the medication (MTX)                                                            | 1 |   |   | 1 | 2 | 3.8 | 5 |     |   |
| I am emotionally affected by the medication                                                          |   |   | 2 | 2 |   | 3.5 | 4 |     |   |
| The medication (MTX) and something else was stopped, as my liver counts increased a lot              | 3 |   |   |   | 1 | 2.0 | 1 |     |   |
| If it gets worse I will stop taking MTX                                                              |   |   | 1 | 2 | 1 | 4.0 | 4 |     |   |
| I have tried to stop taking the medication (but it did not go as well as I had hoped)                |   |   |   | 4 |   | 4.0 | 4 |     |   |
| Has my condition improved while I took the medication..... could I possibly do without it?           |   |   | 2 | 2 |   | 3.5 | 4 |     |   |
| I tried to stop taking MTX, but I became very poorly                                                 | 2 |   |   | 1 | 1 | 2.8 | 3 |     |   |
| I have thought about whether I could do without the medication                                       |   |   |   | 3 | 1 | 4.3 | 4 |     |   |
| I've finally received biological medication                                                          | 2 |   |   | 1 | 1 | 2.8 | 3 |     |   |
| I have high expectations for my biological medication                                                | 1 |   |   | 1 | 2 | 3.8 | 5 |     |   |
| The medication works very differently on different people. Many also have great success stories      | 1 |   | 1 | 2 |   | 3.0 | 4 |     |   |
| Can I get the medication I want                                                                      |   | 1 |   | 2 | 1 | 4.0 | 5 |     |   |



|                                                                                                                                                                            |   |   |   |   |   |     |   |            |          |
|----------------------------------------------------------------------------------------------------------------------------------------------------------------------------|---|---|---|---|---|-----|---|------------|----------|
| I have tested many of the biological preparations - but they had no effect or I could not tolerate them                                                                    | 2 |   | 1 | 1 |   | 2.3 | 2 |            |          |
| Frustrated about having to take MTX for a long time, without it having worked                                                                                              |   |   |   | 2 | 2 | 4.5 | 5 |            |          |
| <b>My own approach (I do something myself)</b>                                                                                                                             |   |   |   |   |   |     |   |            |          |
| I am not overly affected by the illness, such that I can tolerate it if it does not get worse                                                                              |   |   |   | 1 | 2 | 4.7 | 5 | <b>3.6</b> | <b>4</b> |
| I have difficulty performing everyday objects at home - but I will find a solution                                                                                         |   | 1 |   | 3 |   | 3.5 | 4 |            |          |
| One finds a way                                                                                                                                                            |   |   | 2 | 1 | 1 | 3.8 | 4 |            |          |
| Everything is possible, a way is found                                                                                                                                     |   |   | 2 | 1 | 1 | 3.8 | 4 |            |          |
| I find a solution to the problems - so that they do not take over                                                                                                          |   |   | 1 | 3 |   | 3.8 | 4 |            |          |
| I refuse to spend my time worrying about myself - otherwise I couldn't do anything                                                                                         |   | 1 | 1 | 2 |   | 3.3 | 4 |            |          |
| Exercise improves my mood                                                                                                                                                  |   | 1 |   | 1 | 2 | 4.0 | 5 |            |          |
| I think a lot about my illness before I go to the doctor                                                                                                                   |   | 1 |   | 1 | 2 | 4.0 | 5 |            |          |
| When I was diagnosed, I tried many alternative methods                                                                                                                     | 1 |   | 1 |   | 2 | 3.5 | 4 |            |          |
| What can I do myself?                                                                                                                                                      |   |   | 2 | 1 | 1 | 3.8 | 4 |            |          |
| I am amazed that there has been no focus on diet                                                                                                                           | 1 | 1 |   |   | 2 | 3.3 | 4 |            |          |
| Heat helps my illness                                                                                                                                                      | 1 |   |   | 1 | 2 | 3.8 | 5 |            |          |
| When I have been in the sun for 14 days, I can do things I otherwise cannot                                                                                                | 1 |   |   |   | 3 | 4.0 | 5 |            |          |
| Dietary changes can help a person's general condition                                                                                                                      |   | 1 | 2 | 1 |   | 3.0 | 3 |            |          |
| Did not have the patience to wait for the alternative methods to work                                                                                                      | 1 |   | 2 | 1 |   | 2.8 | 3 |            |          |
| Very dry heat helps my arthritis a lot                                                                                                                                     | 1 |   |   | 2 | 1 | 3.5 | 4 |            |          |
| I am not physically active - but I am active with many other things, which keeps me going                                                                                  |   |   |   | 2 | 1 | 4.3 | 4 |            |          |
| <b>The patient against the bureaucracy (Doctors' authority – they have the power)/ Patientization (not a person, but just someone in the system)/Powerless/Frustration</b> |   |   |   |   |   |     |   |            |          |
| Feel that the doctor must "dot the i's" - very bureaucratic                                                                                                                |   | 1 |   | 1 | 2 | 4.0 | 5 | <b>3.2</b> | <b>3</b> |
| It seems odd (I feel stupid) that I must first go through several different drugs before I get the biological medication                                                   | 1 |   |   | 2 | 1 | 3.5 | 4 |            |          |
| I do not like the fact that I have to try different medication before I get the biological one                                                                             | 1 |   | 1 | 1 | 1 | 3.3 | 4 |            |          |
| Very difficult to get biological medication                                                                                                                                | 2 |   |   |   | 2 | 3.0 | 3 |            |          |
| They wear white coats, - so they must know what they are saying                                                                                                            | 1 | 1 | 2 |   |   | 2.3 | 3 |            |          |
| You can feel like an experimental animal                                                                                                                                   | 1 | 1 | 1 | 1 |   | 2.5 | 3 |            |          |
| Some doctors have a personal interest in issuing the medication they say you have to take                                                                                  | 1 | 1 | 1 | 1 |   | 2.5 | 3 |            |          |
| I have received lots of treatments that did not work                                                                                                                       | 1 |   |   | 2 |   | 3.0 | 4 |            |          |
| I've been lucky, doctors have believed in me                                                                                                                               |   |   |   | 1 | 3 | 4.8 | 5 |            |          |
| If I have to increase the dosage, I tell him (the doctor) I will not                                                                                                       |   |   |   | 2 | 1 | 4.3 | 4 |            |          |
| If you are a strong patient (know what you want), you can get suggest some things - you are taken seriously                                                                |   | 1 |   | 2 | 1 | 3.8 | 4 |            |          |
| I do not want MTX - even if they force me to take it - I will find another solution                                                                                        | 1 | 2 |   | 1 | 1 | 3.0 | 3 |            |          |
| I wonder if they really can force me to take MTX or biological medication                                                                                                  | 2 |   |   |   | 2 | 3.0 | 3 |            |          |
| The doctor says that if I do not do as he says, he will not visit me                                                                                                       | 3 |   |   |   | 1 | 2.0 | 1 |            |          |
| <b>Meeting with the system (municipality)</b>                                                                                                                              |   |   |   |   |   |     |   |            |          |
| No consideration is given to my situation as regards what I can do now, and which jobs are open to me                                                                      |   |   |   | 1 | 2 | 4.7 | 5 | <b>3.3</b> | <b>3</b> |
| The municipality does not believe what I say                                                                                                                               |   |   | 1 |   | 3 | 4.5 | 5 |            |          |
| The system (the municipality) does not believe what the doctors say is wrong with me                                                                                       |   |   |   | 2 | 2 | 4.5 | 5 |            |          |
| The cash system has no understanding of my situation                                                                                                                       |   |   |   | 2 | 1 | 4.3 | 4 |            |          |
| It cannot be right that you go and say you hurt everywhere (says the municipality)                                                                                         |   |   | 1 | 1 | 2 | 4.3 | 5 |            |          |



|                                                                                                                                          |   |   |   |   |   |     |   |            |          |
|------------------------------------------------------------------------------------------------------------------------------------------|---|---|---|---|---|-----|---|------------|----------|
| Trying to get help from the unemployment benefit system - but it is very hard                                                            |   |   |   | 1 | 2 | 4.7 | 5 |            |          |
| It is scary that it is not the same for everyone - but hard to see how it could be different                                             |   |   | 2 | 1 | 1 | 3.8 | 4 |            |          |
| Very hard to get aids from Copenhagen municipality - depending on where you live                                                         | 1 |   | 1 | 1 | 1 | 3.3 | 4 |            |          |
| I would like to be offered training (they do not want to be liable for me in the gym)                                                    |   | 2 |   | 2 |   | 3.0 | 3 |            |          |
| Everything is about the economy                                                                                                          | 1 |   | 2 | 1 |   | 2.8 | 3 |            |          |
| Tried to get help for babies from the municipality, but I couldn't                                                                       | 2 | 1 |   |   | 1 | 2.3 | 2 |            |          |
| Difficult to get further training because of the economy                                                                                 | 1 |   | 1 |   | 1 | 3.0 | 3 |            |          |
| Applying for a flexible job was a struggle                                                                                               | 2 |   |   |   | 1 | 2.3 | 1 |            |          |
| Contact with the public system is gruelling                                                                                              | 1 |   |   | 1 | 1 | 3.3 | 4 |            |          |
| You have to be mentally prepared to do battle with the system (the municipality)                                                         |   | 1 |   | 1 | 1 | 3.7 | 4 |            |          |
| You are constantly confronted with the limitations of the illness in everyday life                                                       |   |   |   | 3 |   | 4.0 | 4 |            |          |
| While applying for flexible jobs, I was constantly asked how sick I really am                                                            | 2 |   |   |   | 1 | 2.3 | 1 |            |          |
| <b>Difficult having an invisible disability</b>                                                                                          |   |   |   |   |   |     |   |            |          |
| I have a difficulty saying that I cannot do the same things as before                                                                    |   |   |   | 2 | 1 | 4.3 | 4 | <b>3.4</b> | <b>3</b> |
| Hard to tell people that I have psoriatic arthritis                                                                                      |   |   | 1 | 1 | 1 | 4.0 | 4 |            |          |
| Annoying that you have to give a long scientific report if you cannot drink a glass of wine                                              |   | 1 | 1 | 1 | 1 | 3.5 | 4 |            |          |
| People misunderstand the reason why you cannot drink alcohol                                                                             |   | 1 | 1 |   | 1 | 3.3 | 3 |            |          |
| People have trouble understanding that I cannot drink a beer or a glass of wine as before, due to the medication                         |   | 1 | 2 |   | 1 | 3.3 | 3 |            |          |
| You have to justify why you cannot drink a glass of wine                                                                                 |   | 1 | 2 |   | 1 | 3.3 | 3 |            |          |
| If you tell people that you are receiving chemotherapy (MTX), they become frightened                                                     |   | 1 | 1 | 1 | 1 | 3.5 | 4 |            |          |
| Can feel that some people are reluctant to touch me because of my illness                                                                |   |   |   | 2 | 1 | 4.3 | 4 |            |          |
| Get the feeling that people feel sorry for me                                                                                            |   | 1 | 1 | 1 | 1 | 3.5 | 4 |            |          |
| Feel I am not being taken seriously                                                                                                      | 1 | 1 | 1 | 1 |   | 2.5 | 3 |            |          |
| People have difficulty understanding how sick I am, since you cannot see it                                                              |   |   |   | 2 | 1 | 4.3 | 4 |            |          |
| Difficult having an invisible disability                                                                                                 |   |   |   | 2 | 1 | 4.3 | 4 |            |          |
| Hard to explain to people how much pain I'm in                                                                                           |   |   |   | 1 | 2 | 4.7 | 5 |            |          |
| A lot of the arthritis pain is difficult to explain                                                                                      |   |   |   | 2 | 1 | 4.3 | 4 |            |          |
| *Rating - 1: 'Not important at all', 2: 'A little important', 3: 'Somewhat important', 4: 'Very important' and 5: 'Of great importance'. |   |   |   |   |   |     |   |            |          |

## All statements divided in concepts from the PSORIASIS workshops

| Statements                                                                                                | Frequency of rating* |   |   |   |   | Statement |        | Concept    |          |
|-----------------------------------------------------------------------------------------------------------|----------------------|---|---|---|---|-----------|--------|------------|----------|
|                                                                                                           | 1                    | 2 | 3 | 4 | 5 | Mean      | Median | Mean       | Median   |
| <b>Social and psychological problems, the shame</b>                                                       |                      |   |   |   |   |           |        |            |          |
| It scares me to show my illness to strangers                                                              |                      |   |   | 1 | 4 | 4.8       | 5      | <b>4.0</b> | <b>4</b> |
| The shame of skin flaking                                                                                 |                      |   | 1 |   | 4 | 4.6       | 5      |            |          |
| Self-esteem disappears                                                                                    |                      |   | 2 |   | 3 | 4.2       | 5      |            |          |
| I was terrified to talk to girls (as a teenager)                                                          | 2                    |   | 1 |   | 2 | 3.0       | 3      |            |          |
| It goes beyond my vanity                                                                                  |                      |   | 2 |   | 3 | 4.2       | 5      |            |          |
| Do not want to display it in public                                                                       |                      |   | 2 | 1 | 2 | 4.0       | 4      |            |          |
| Ashamed of the impression the illness makes (must shake the sheets after sleeping in the homes of others) |                      | 1 |   |   | 4 | 4.4       | 5      |            |          |
| It affected me socially                                                                                   |                      |   | 3 |   | 2 | 3.8       | 3      |            |          |
| My nails look like they've been hit with a hammer                                                         |                      |   |   | 1 | 4 | 4.8       | 5      |            |          |
| Do not show it to others (if, for example, I sleep in a hotel room with others)                           | 1                    |   |   |   | 4 | 4.2       | 5      |            |          |
| Hated physical education in school                                                                        | 1                    |   |   | 2 | 2 | 3.8       | 4      |            |          |
| Socially hampered me greatly                                                                              | 1                    |   | 2 |   | 2 | 3.4       | 3      |            |          |
| Build barriers to protect myself                                                                          | 2                    |   | 1 |   | 2 | 3.0       | 3      |            |          |
| Life before biological treatment -> I would not wear t-shirts or shorts                                   | 1                    |   | 2 | 2 |   | 3.0       | 3      |            |          |
| Felt like a leper                                                                                         | 1                    | 2 |   |   | 2 | 3.0       | 2      |            |          |
| Was very modest                                                                                           | 1                    |   | 4 |   |   | 2.6       | 3      |            |          |
| I have to prepare myself mentally for a few days beforehand if I have to show myself/my illness in public |                      | 2 |   | 1 | 2 | 3.6       | 4      |            |          |
| Do not wear t-shirts                                                                                      | 1                    |   | 2 | 2 |   | 3.0       | 3      |            |          |
| You shut yourself in                                                                                      | 2                    |   | 1 |   | 1 | 2.5       | 2      |            |          |
| <b>Genes, pain, symptoms</b>                                                                              |                      |   |   |   |   |           |        |            |          |
| It itches all the time                                                                                    |                      |   |   | 1 | 3 | 4.8       | 5      | <b>3.7</b> | <b>4</b> |
| Bleeding wounds - hurts                                                                                   |                      |   | 1 |   | 3 | 4.5       | 5      |            |          |
| The wounds are very painful                                                                               |                      |   | 1 |   | 3 | 4.5       | 5      |            |          |
| Painful when wounds cracks                                                                                |                      |   | 2 |   | 3 | 4.2       | 4      |            |          |
| Cannot help scratching                                                                                    |                      |   | 2 |   | 2 | 4.0       | 4      |            |          |
| The nails come loose (very fragile)                                                                       |                      |   |   | 1 | 4 | 4.8       | 5      |            |          |
| Affects the nails - nails take on another shape                                                           |                      |   |   | 1 | 4 | 4.8       | 5      |            |          |
| Can be hard to sleep due to pain                                                                          |                      |   |   |   | 5 | 5.0       | 5      |            |          |
| The cracks are very painful                                                                               |                      |   | 3 |   | 1 | 3.4       | 3      |            |          |
| Wake up because you feel it all the time                                                                  |                      |   |   | 2 | 3 | 4.6       | 5      |            |          |
| It's a kind of hell for us                                                                                |                      |   | 2 | 1 | 2 | 4.0       | 4      |            |          |
| "don't scratch it" - it's really hard!                                                                    |                      | 2 |   |   | 3 | 3.2       | 4      |            |          |
| I have become thin-skinned                                                                                |                      |   | 2 | 1 | 1 | 3.8       | 4      |            |          |
| The skin cracks if I bend down, - very painful                                                            |                      | 1 | 1 | 1 | 1 | 3.5       | 4      |            |          |
| Often have difficulty walking and running (bottom of feet crack)                                          |                      |   |   |   | 5 | 5.0       | 5      |            |          |
| Cutting nails f**king hurts                                                                               | 2                    |   |   | 1 | 2 | 3.2       | 4      |            |          |
| Constantly in pain                                                                                        |                      |   |   | 3 | 2 | 4.4       | 4      |            |          |
| Constant inflammation in the elbows. I chose not to protect myself (due to my work)                       |                      | 1 | 2 | 1 |   | 3.0       | 3      |            |          |
| The clothes can be troublesome - feels painful                                                            |                      |   | 3 | 2 |   | 3.4       | 3      |            |          |
| Itching can become pain                                                                                   |                      |   | 4 | 1 |   | 3.2       | 3      |            |          |
| Burning and stinging underfoot, mostly at night - wake in the night                                       |                      |   | 2 | 2 | 1 | 3.8       | 4      |            |          |
| Outbreaks make eyes sensitive to light                                                                    | 2                    |   | 2 | 1 |   | 2.6       | 3      |            |          |
| I think it has been a serious disability                                                                  | 1                    | 1 |   |   | 2 | 3.3       | 4      |            |          |
| <b>At the doctor/the doctor knows my body</b>                                                             |                      |   |   |   |   |           |        |            |          |
| The doctors must listen to what I say                                                                     |                      |   |   | 3 | 2 | 4.4       | 4      | <b>3.7</b> | <b>4</b> |
| It is a matter of being taken seriously as a person                                                       |                      |   |   | 3 | 2 | 4.4       | 4      |            |          |
| I know my body better than anyone else                                                                    |                      |   | 2 | 1 | 2 | 4.0       | 4      |            |          |

|                                                                                                                      |   |   |   |   |   |     |   |            |          |
|----------------------------------------------------------------------------------------------------------------------|---|---|---|---|---|-----|---|------------|----------|
| It is infinitely annoying that doctors focus on numbers and not on what the individual patient wishes                |   |   | 3 |   | 2 | 3.8 | 4 |            |          |
| There is no understanding that I know my body better - "try to investigate what I think the problem is"              |   |   | 1 | 2 | 2 | 4.2 | 4 |            |          |
| (the doctor) lacks understanding of the individual                                                                   |   |   | 3 |   | 2 | 3.8 | 4 |            |          |
| Seems annoying constantly having to tell the same story again and again                                              |   |   | 3 |   | 2 | 3.8 | 4 |            |          |
| Hard to relate to "numbers" the doctor uses...                                                                       |   |   | 3 |   | 2 | 3.8 | 4 |            |          |
| When I'm standing half naked in Bispebjerg - many people come in looking for/asking about something - it bothers me! |   | 1 | 1 | 1 | 1 | 3.5 | 4 |            |          |
| Panicked about the fact that no one knew what was wrong with me                                                      |   |   |   | 3 | 1 | 4.3 | 4 |            |          |
| It's tough fighting the system                                                                                       |   |   | 3 |   | 2 | 3.8 | 4 |            |          |
| A year and six months passed before I was diagnosed - even though I had psoriasis all over me                        |   |   |   | 2 | 2 | 4.5 | 5 |            |          |
| From the beginning, I was bounced around the system - they had no idea what was wrong                                |   | 1 | 1 | 1 | 1 | 3.5 | 4 |            |          |
| My GP had no idea what was wrong with me and recommended I try all sorts of creams - to no effect!                   | 1 | 1 |   | 1 | 1 | 3.0 | 3 |            |          |
| Long wait for treatment                                                                                              | 1 |   | 1 | 1 | 1 | 3.3 | 4 |            |          |
| How do I know if I'm getting the best treatment?                                                                     |   |   |   | 2 | 3 | 4.6 | 5 |            |          |
| We are subjected to a lot of different things - how do I know that it is the best treatment                          |   |   | 2 | 1 | 2 | 4.0 | 4 |            |          |
| I don't think that my treatment is good enough (apply cream, tar ointment, steroid creams + pellets)                 | 2 |   |   | 2 | 1 | 3.0 | 4 |            |          |
| Felt that doctors were uncertain as to which treatment was best                                                      |   |   | 1 | 3 |   | 3.8 | 4 |            |          |
| Doctors are sometimes searching in the dark                                                                          |   |   | 1 | 3 |   | 3.8 | 4 |            |          |
| I told my doctor that it doesn't seem good enough                                                                    | 2 |   |   | 1 | 2 | 3.2 | 4 |            |          |
| The doctor thinks we have to wait and see... and then maybe change treatment                                         | 2 |   | 2 | 1 |   | 2.4 | 3 |            |          |
| Continuing to try new medications - because the effect wears off                                                     |   | 1 | 1 | 1 | 1 | 3.5 | 4 |            |          |
| Feel like the doctors are experimenting on me                                                                        |   | 1 | 1 | 2 |   | 3.3 | 4 |            |          |
| You have to hurry when you are in discussions with the doctor                                                        | 1 |   | 2 |   | 1 | 3.0 | 3 |            |          |
| Was diagnosed... I thought what now... did not know much about the illness                                           |   |   |   | 2 | 2 | 4.5 | 5 |            |          |
| Not nice when the dermatologist does not say that the hormone cream enters the bloodstream                           | 1 |   |   |   | 3 | 4.0 | 5 |            |          |
| I have read that inadequate treatments can lead to complications                                                     |   |   | 2 |   | 3 | 4.2 | 5 |            |          |
| I don't know the reason behind the sudden flare up                                                                   |   |   | 4 | 1 |   | 3.2 | 3 |            |          |
| I thought of all the pictures I had seen and thought about it a lot                                                  |   |   | 1 | 2 | 1 | 4.0 | 4 |            |          |
| I have not been told the adverse effects of biological medication (from the doctor/hospital)                         | 1 |   | 1 |   | 2 | 3.5 | 4 |            |          |
| Worried about sequelae (e.g. arthritis)                                                                              |   |   | 4 |   | 1 | 3.4 | 3 |            |          |
| Spreading makes me uneasy (I've got it in more places than just on my hands and feet)                                |   | 2 | 2 |   | 1 | 3.0 | 3 |            |          |
| I do not know the adverse effects of biological medication                                                           | 1 | 1 | 1 | 1 |   | 2.5 | 3 |            |          |
| MTX → adverse effect - is said that you can die from it                                                              |   |   |   | 2 | 3 | 4.6 | 5 |            |          |
| I was terrified when I was diagnosed, - had seen some terrible images                                                |   | 1 | 1 | 2 |   | 3.3 | 4 |            |          |
| I have no idea why I got the illness                                                                                 |   | 2 | 3 |   |   | 2.6 | 3 |            |          |
| Have been told that the illness reduces length of life by 2 years                                                    |   |   | 4 | 1 |   | 3.2 | 3 |            |          |
| <b>Medication and treatment</b>                                                                                      |   |   |   |   |   |     |   |            |          |
| I noticed that all of my symptoms disappeared within 14 days (with biological medication)                            |   |   |   |   | 5 | 5.0 | 5 | <b>3.5</b> | <b>4</b> |
| Biological treatment is a miracle!                                                                                   |   |   |   | 1 | 4 | 4.8 | 5 |            |          |
| What happens if the medication does not work any more - or if I do not get it any more                               |   |   |   | 1 | 3 | 4.8 | 5 |            |          |
| Am I guaranteed to receive Humira forever                                                                            |   |   |   | 1 | 3 | 4.8 | 5 |            |          |
| Subsidies are continuously being cut - concerned about continuing to receive Humira                                  |   |   |   | 1 | 3 | 4.8 | 4 |            |          |
| May be concerned about money for biological treatment running out                                                    |   |   | 2 |   | 3 | 4.2 | 5 |            |          |
| Will I get the illness again (major concern)                                                                         |   |   |   | 2 | 2 | 4.5 | 5 |            |          |

|                                                                                                                                  |   |   |   |   |   |     |   |     |   |
|----------------------------------------------------------------------------------------------------------------------------------|---|---|---|---|---|-----|---|-----|---|
| I am a little cautious (medication) about what I put in my body                                                                  |   |   |   | 2 | 2 | 4.5 | 5 |     |   |
| I would not take MTX due to adverse effects - did not say in the leaflet what was good about MTX                                 |   |   | 3 |   | 2 | 3.6 | 8 |     |   |
| This is not the end (if this treatment does not work, then it's on to the next)                                                  | 1 |   | 1 |   | 2 | 3.5 | 4 |     |   |
| Must take medication for the rest of my life                                                                                     |   | 2 |   | 3 |   | 3.2 | 4 |     |   |
| I think the hospital I am affiliated to is great                                                                                 | 1 |   |   | 1 | 2 | 3.8 | 5 |     |   |
| It flares up immediately if I miss a treatment (biological treatment)                                                            |   |   | 1 | 2 | 2 | 4.2 | 4 |     |   |
| I do not think about it in my day to day life any more - my treatment works                                                      | 2 |   |   | 1 | 1 | 2.8 | 3 |     |   |
| I am not in pain                                                                                                                 | 4 |   | 1 |   |   | 1.4 | 1 |     |   |
| Do not like wasting my time on discussions with the doctor (feel good) - would rather the doctor spent time on those who need it |   | 4 |   |   |   | 2.0 | 2 |     |   |
| I tolerate MTX                                                                                                                   |   |   | 2 |   | 2 | 4.0 | 4 |     |   |
| Individually what the body can tolerate                                                                                          |   |   | 4 | 1 |   | 3.2 | 3 |     |   |
| I put on weight after the MTX treatment - it is a side effect.                                                                   | 1 |   |   | 1 | 2 | 3.8 | 5 |     |   |
| Biological medication also affects the liver                                                                                     | 1 |   |   | 1 | 2 | 3.8 | 5 |     |   |
| I could not tolerate MTX                                                                                                         | 1 |   | 1 |   | 2 | 3.5 | 4 |     |   |
| The skin peeled off my heels (received MTX)                                                                                      | 1 |   | 1 | 1 | 1 | 3.3 | 4 |     |   |
| My skin has become thinner, because I have applied all sorts of creams                                                           |   | 1 | 2 |   | 1 | 3.3 | 3 |     |   |
| I am bad all over (open sores), - do not know if it is an adverse effect                                                         | 1 |   | 2 | 1 |   | 2.8 | 3 |     |   |
| Could not tolerate MTX                                                                                                           | 2 |   |   | 1 | 2 | 3.2 | 4 |     |   |
| Was quite mad about MTX                                                                                                          | 2 |   |   | 1 | 2 | 3.2 | 4 |     |   |
| Must be more aware of how I move (easily bruised)                                                                                | 1 | 2 | 1 |   |   | 2.1 | 2 |     |   |
| Suffered adverse effects from previous treatments (steroid cream) - bruising                                                     | 2 | 1 | 1 |   |   | 1.8 | 2 |     |   |
| Nausea after MTX                                                                                                                 | 3 |   |   | 1 |   | 1.8 | 1 |     |   |
| <b>Relationship with partner/others</b>                                                                                          |   |   |   |   |   |     |   |     |   |
| Lack of discussion with others in the same situation                                                                             | 2 |   |   |   | 3 | 3.4 | 5 |     |   |
| Would love to participate in network groups                                                                                      | 2 |   |   |   | 3 | 3.4 | 5 |     |   |
| No one understands the illness                                                                                                   |   |   | 3 |   | 2 | 3.8 | 3 |     |   |
| Do not understand why there is no network groups (the psoriasis association)                                                     | 2 |   | 2 |   | 1 | 2.6 | 3 |     |   |
| Feel all alone with the illness                                                                                                  |   |   | 4 |   | 1 | 3.4 | 3 |     |   |
| No one who knows the illness                                                                                                     |   |   | 3 |   | 2 | 3.8 | 3 |     |   |
| Intimate relationships - what do partners think?                                                                                 | 1 |   |   | 1 | 2 | 3.8 | 5 |     |   |
| My own thoughts about myself as regards being intimate with others                                                               | 1 |   |   | 1 | 2 | 3.8 | 5 |     |   |
| What do partners think - they think it's disgusting                                                                              | 1 |   |   | 1 | 2 | 3.8 | 5 |     |   |
| Affects my sex life (no fun if you have cream applied all over one's body)                                                       | 1 | 2 |   |   | 2 | 3.0 | 2 |     |   |
| Enjoy less sex during treatment - also affects me mentally                                                                       | 2 |   | 2 | 1 |   | 2.4 | 3 |     |   |
| Concern when starting a new relationship                                                                                         | 1 |   | 1 | 1 | 1 | 3.3 | 4 |     |   |
| What does my partner think about how I look ("my butt looks like a baboon's")                                                    | 1 |   | 1 | 1 | 1 | 3.3 | 4 |     |   |
| There are days when you do not feel like sex                                                                                     |   | 3 | 2 |   |   | 2.4 | 2 | 3.2 | 3 |
| Will I get a girlfriend/wife                                                                                                     | 1 |   | 2 |   | 1 | 3.0 | 3 |     |   |
| It's not contagious                                                                                                              | 1 |   |   | 2 | 1 | 3.5 | 4 |     |   |
| Others are afraid of touching me. They think it's contagious                                                                     |   | 2 |   | 1 | 1 | 3.3 | 3 |     |   |
| Feel that people seem scared                                                                                                     | 2 |   | 1 |   | 2 | 3.0 | 3 |     |   |
| Feel that people keep a distance                                                                                                 | 2 |   | 1 |   | 2 | 3.0 | 3 |     |   |
| Kept my distance from having a social life with others                                                                           | 3 |   |   |   | 2 | 2.6 | 1 |     |   |
| I've met people that would not shake my hand                                                                                     | 2 |   | 2 | 1 |   | 2.4 | 3 |     |   |
| Are you contagious/non-contagious...                                                                                             | 2 |   | 3 |   |   | 2.2 | 3 |     |   |
| Everyone stares                                                                                                                  | 1 | 2 |   |   | 1 | 2.5 | 2 |     |   |
| Others are afraid that it is contagious                                                                                          |   | 2 | 2 |   |   | 2.5 | 3 |     |   |
| People look at me funny                                                                                                          | 2 | 1 |   |   | 1 | 2.3 | 2 |     |   |
| When you go to work, you feel very dirty (hair made greasy by treatment/tar)                                                     |   | 1 |   | 1 | 2 | 4.0 | 5 |     |   |
| Friends think it is helping, but it is not - it's f**king annoying when they comment on my flaky/oatmeal skin                    |   | 2 |   |   | 2 | 3.5 | 4 |     |   |

|                                                                                                                                              |   |   |   |   |   |     |   |     |   |
|----------------------------------------------------------------------------------------------------------------------------------------------|---|---|---|---|---|-----|---|-----|---|
| It looks ugly                                                                                                                                | 1 | 1 |   |   | 2 | 3.3 | 4 |     |   |
| I think it is uncomfortable for others (girlfriend/wife) to hold my hand                                                                     | 2 |   | 2 | 1 |   | 2.4 | 3 |     |   |
| Confronted with my illness everyday                                                                                                          | 3 |   |   |   | 1 | 2.0 | 1 |     |   |
| Must always explain why you do not have a shot with your coffee                                                                              |   | 4 | 1 |   |   | 2.2 | 2 |     |   |
| Many offer me good advice - know-it-alls                                                                                                     | 2 |   | 3 |   |   | 2.2 | 3 |     |   |
| No understanding of the limitations caused by the illness (cannot drink a little schnapps)                                                   |   | 4 | 1 |   |   | 2.2 | 2 |     |   |
| "It's not an illness that can kill you," but that does not alter the illness's impact on life                                                | 1 | 1 | 1 | 1 |   | 2.5 | 3 |     |   |
| <b>Own attitude/personal perception</b>                                                                                                      |   |   |   |   |   |     |   |     |   |
| The sooner you accept the illness the better                                                                                                 |   |   | 1 | 2 | 1 | 4.0 | 4 |     |   |
| The illness controlled my life more before I learned to accept it                                                                            |   |   | 2 | 1 | 2 | 4.0 | 4 |     |   |
| In my teenage years, I always had an answer ready if someone asked about the illness                                                         | 2 |   | 3 |   |   | 2.2 | 3 |     |   |
| Will have to accept the illness                                                                                                              | 1 |   |   | 1 | 2 | 3.8 | 5 |     |   |
| Depends on the stage of your life when you are diagnosed (how old you are) as regards accepting the illness                                  |   | 1 |   | 2 | 1 | 3.8 | 4 |     |   |
| You must be careful that it does not take over your life                                                                                     | 1 |   | 2 | 1 |   | 2.8 | 3 |     |   |
| I was dressed up in the summer - would not show myself due to the illness                                                                    | 1 |   | 2 |   | 1 | 3.0 | 3 |     |   |
| Will my children also suffer this illness?                                                                                                   | 1 |   | 1 |   | 2 | 3.5 | 4 |     |   |
| Decided early on that I would not bring children into the world - do not want them to experience the same thing                              |   |   | 4 |   | 1 | 3.3 | 3 |     |   |
| When you reach the stage of daring to expose yourself, then you have won a battle                                                            |   |   | 2 | 1 | 2 | 4.0 | 4 |     |   |
| I believe you have to be honest and speak about it                                                                                           |   |   | 2 | 2 |   | 3.5 | 4 |     |   |
| I have decided that it is not my problem what others think                                                                                   | 1 |   |   | 2 | 1 | 3.5 | 4 | 3.2 | 3 |
| I don't want to hear about my "oatmeal"                                                                                                      | 1 | 1 |   | 1 | 1 | 3.0 | 3 |     |   |
| I don't want to hear that it is contagious or it's disgusting                                                                                | 1 | 1 |   | 1 | 1 | 3.0 | 3 |     |   |
| I told my friends that I do not want to constantly hear about the illness                                                                    | 2 |   |   | 1 | 1 | 2.8 | 3 |     |   |
| I won't cover myself up - if they want, they can just ask me                                                                                 | 3 |   |   |   | 1 | 2.0 | 1 |     |   |
| It would be fine if my psoriasis remains stable - I can live with itching                                                                    |   | 2 |   |   | 3 | 3.8 | 5 |     |   |
| You learn to live with it                                                                                                                    |   | 2 | 1 |   | 2 | 3.4 | 3 |     |   |
| Only learned to accept the illness at the age of 40                                                                                          |   |   | 2 | 1 | 2 | 4.0 | 4 |     |   |
| Men are not as meticulous as women as regards appearance                                                                                     |   |   | 3 | 1 |   | 3.3 | 3 |     |   |
| You cannot be cured of the illness                                                                                                           |   | 2 |   | 1 | 2 | 3.6 | 4 |     |   |
| "To be looked at and touched is very nice"                                                                                                   | 1 |   | 1 | 2 |   | 3.0 | 4 |     |   |
| I have to vacuum constantly (white flakes over everything)                                                                                   | 2 |   | 2 |   |   | 2.0 | 2 |     |   |
| "Kids thought I had burned myself in a fire"                                                                                                 | 3 |   |   |   | 1 | 2.0 | 1 |     |   |
| I have never experienced itching                                                                                                             | 3 |   | 1 |   |   | 1.5 | 1 |     |   |
| Nivea cream can combat the worst dryness                                                                                                     | 1 | 4 |   |   |   | 1.8 | 2 |     |   |
| <b>The impact of the illness/the illness itself</b>                                                                                          |   |   |   |   |   |     |   |     |   |
| There were jobs that I did not get because of my illness (was turned down by the Military - could not wear a helmet because I had psoriasis) |   |   | 1 |   | 3 | 4.5 | 5 |     |   |
| People really focused on my hands (due to the illness) as regards my job (working with people)                                               |   | 1 |   | 1 | 2 | 4.0 | 5 |     |   |
| Jobs don't grow on trees (especially with illness)                                                                                           |   | 2 | 1 | 2 |   | 3.0 | 3 |     |   |
| Absenteeism for treatment can be a problem                                                                                                   |   | 2 | 1 | 2 |   | 3.0 | 3 |     |   |
| My illness has prevented me from taking some jobs                                                                                            | 1 | 1 | 1 |   | 1 | 2.8 | 3 |     |   |
| Psoriasis is triggered by stress                                                                                                             |   |   | 2 |   | 2 | 4.0 | 4 |     |   |
| I cannot tolerate alcohol - the illness flares up                                                                                            |   | 2 | 2 | 1 |   | 2.8 | 3 |     |   |
| Stress can trigger the symptoms                                                                                                              | 2 |   | 1 |   | 2 | 3.0 | 3 |     |   |
| I think that psoriasis can be controlled through diet                                                                                        | 1 |   | 3 |   |   | 2.5 | 3 |     |   |
| It is a lifelong treatment - it limits the joy when it works                                                                                 |   | 2 |   |   | 3 | 3.8 | 5 |     |   |
| Due to large patches on my buttocks, it was hard to sit on the bus etc.                                                                      |   |   |   | 2 | 2 | 4.5 | 5 |     |   |
| Can I move to Aarhus and get my medication there?                                                                                            | 1 |   | 1 | 1 | 1 | 3.3 | 4 |     |   |
| You must always take the medication                                                                                                          | 1 | 1 | 1 |   | 1 | 2.8 | 3 |     |   |

|                                                                                                                                          |   |   |   |   |  |     |   |  |  |
|------------------------------------------------------------------------------------------------------------------------------------------|---|---|---|---|--|-----|---|--|--|
| When planning holidays, it must be taken into account when the medication must be taken etc.                                             | 1 | 1 | 1 | 1 |  | 2.5 | 3 |  |  |
| It is too difficult to bring the medication on vacation - we plan our vacation on that basis                                             | 1 | 1 | 1 | 1 |  | 2.5 | 3 |  |  |
| I would like to get a tattoo - but do not dare - imagine it caused the illness to come back                                              | 1 |   | 3 |   |  | 2.5 | 3 |  |  |
| I think about my illness, since it requires logistics (must be retrieved, brought along, etc.)                                           | 1 | 1 | 1 | 1 |  | 2.5 | 3 |  |  |
| I cannot just leave on my boat for long periods, because I must have the treatment                                                       | 2 |   | 3 |   |  | 2.2 | 3 |  |  |
| *Rating - 1: 'Not important at all', 2: 'A little important', 3: 'Somewhat important', 4: 'Very important' and 5: 'Of great importance'. |   |   |   |   |  |     |   |  |  |
